# Supplementary material for: Is Dengue Vector Control Deficient in Effectiveness or Evidence?: Systematic Review and Meta-analysis
Source: PLoS Negl Trop Dis. 2016 Mar 17;10(3):e0004551. doi: 10.1371/journal.pntd.0004551 (PMC4795802; doi:10.1371/journal.pntd.0004551)
Supplement: S2 Table — (XLSX) [file pntd.0004551.s003.xlsx]

## Sheet: Sheet1
	Reference Number	Study	Generation of allocation sequence	Allocation concealment	Blinding (for AEs)	Incomplete outcome data (for AEs)	Selective outcome reporting (for AEs)
	47	Vanlerberghe et al. 2010	Low risk - drawing numbers from a bag	Unclear risk - not know whether investigator was randomising to a known group	High risk - participants knew of allocation to intervention arm	Low risk - all intervention clusters received treatment and were analysed	Low risk - could have reported container index, however reported all other indices.
	54	Kusumawathie et al. 2009	Unclear risk - sequence generation not reported, although was randomised	High risk - not known whether investigator was randomising to a known group	High risk - participants knew of allocation to intervention arm	Low risk - all tanks were monitored throughout the study	Low risk - all tank data were analysed and reported
	71	Toledo et al. 2007	Unclear risk - randomisation occurred but method not described	Unclear risk - not known whether investigator was randomising to known group	High risk - participants knew of allocation to intervention arm	Low risk - all clusters were analysed and reported	Low risk - all outcomes were reported, although additional outcomes (HI, CI) may have been possible
	73	Arunachalam et al 2012	Low risk - sequence generated using random numbers	Low risk - protocol ensured participants could not know of allocation	High risk - participants knew of allocation to intervention arm	Low risk - all clusters (households) completed the trial and data were analysed reported	Low risk - all outcome data were analysed/ reported
	75	Loroño-Pino et al. 2013	High risk - no randomisation process described	High risk - investigators knew of following household allocation	High risk - participants knew of allocation to intervention arm	High risk - number of participants with nets analysed was lower than those enrolled	Low risk - all outcomes analysed and reported
	76	Lenhart et al. 2013	Low risk - randomised lottery within strata	Unclear risk - not apparent how investigators were not aware of upcoming allocation	High risk - participants knew of allocation to intervention arm	Low risk - number of clusters maintained throughout the study, although number of households dropped throughout - this was reported	Low risk - all study outcomes analysed and reported
	77	Vanlerberghe et al. 2013	Unclear risk - reported as randomised but method not described	High risk - investigators chose controls based on proximity to intervention homes	High risk - participants knew of allocation to intervention arm	Low risk - number of households lost to follow up were low and reported	Low risk - all outcomes were analysed and reported
	81	Deneger et al 2014	Low risk - households were randomised based on coin toss	High risk - investigators knew of allocation to intervention prior to coin toss	High risk - participants knew of allocation to intervention arm	Unclear risk - number of households maintained throughout not reported	Low risk - all outcomes analysed and reported
	83	Castro et al 2012	Unclear - randomisation process not described	Unclear risk - allocation not described	High risk - participants knew of allocation to intervention arm	Low risk - all clusters completed the study, household exclusions reported	Low risk - all outcomes analysed and reported
